# Supplementary material for: Green Pea (Pisum sativum L.) Hull Polyphenol Extracts Ameliorate DSS-Induced Colitis through Keap1/Nrf2 Pathway and Gut Microbiota Modulation
Source: MDPI journal article supplement (doi:10.3390/foods10112765), 2021-11-11
Supplement: s1 [file s1]

# Supplementary materials

**Table S1.** The criteria of DAI.

| Body weight loss (%) | Stool consistency | Rectal bleeding                     | Activity states              | Score |
|----------------------|-------------------|-------------------------------------|------------------------------|-------|
| No change            | Normal            | No observable blood                 | Normal                       | 0     |
| 1-5                  | Loose stool       | Small amount of blood in some stool | Some signs of poor condition | 1     |
| 5-10                 | Mild diarrhea     | Blood in stool regularly seen       | Moderately poor condition    | 2     |
| ≥10                  | Diarrhea          | Blood in all stool                  | Bad condition                | 3     |

**Table S2.** The criteria of histological score.

| Inflammatory cell infiltration | Mucosal injury        | Crypt distortion                              | Area of lesions (%) | Score |
|--------------------------------|-----------------------|-----------------------------------------------|---------------------|-------|
| None                           | None                  | None                                          | None                | 0     |
| Mild                           | Mucous layer          | 1/3                                           | 1-25                | 1     |
| Moderate                       | Submucosa             | 2/3                                           | 26-50               | 2     |
| Severe                         | Muscularis and serosa | 100%                                          | 51-75               | 3     |
| —                              | —                     | Entire crypt and surface epithelium destroyed | 76-100              | 4     |
